# Supplementary material for: Implementation and application of an improved phase spectrum determination scheme for Fourier transform spectrometry
Source: Copernicus journal article supplement (doi:10.5194/amt-18-1257-2025), 2025-03-12
Supplement: Supplementary file 3 [file amt-18-1257-2025-supplement.zip]

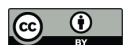

## *Supplement of*

# **Implementation and application of an improved phase spectrum determination scheme for Fourier transform spectrometry**

**Frank Hase et al.**

*Correspondence to:* Frank Hase ([frank.hase@kit.edu](mailto:frank.hase@kit.edu))

- [amt-18-1257-2025-supplement-title-page.pdf](#)
- [supplement](#)
  - [coccon-processing-code](#)
    - \* [PROFFASTv2.4.zip](#)
  - [spectra-OPUS-format](#)
    - \* [EM27SUN](#)
    - \* [IFS125HR-IZANA](#)
    - \* [IRCUBE](#)
    - \* [VERTEX70](#)

The copyright of individual parts of the supplement might differ from the article licence.
